# Supplementary material
Source: publisher site journal article supplement (https://static.cambridge.org/content/id/urn:cambridge.org:id:article:S0043887114000306/resource/name/S0043887114000306_supp_mat.pdf)
Supplement: Supplementary file 1 [file S0043887114000306_supp_mat.pdf]

## **Supplemental Material:**

### **“The Art of the Possible: Power Sharing and Post-Civil War Democracy.”**

**Caroline A. Hartzell and Matthew Hoddie**

#### **Data and Measurements**

We employ a panel time-series dataset consisting of all cases of civil wars fought and ended during the period from 1945 to 2006. We classify an intrastate conflict as a civil war if it meets the criteria employed by Small and Singer (1982) in the Correlates of War project. We operationalize our variables as follows:

#### **Outcome Equation**

- (1) *Democracy*: Coded “1” for the first year following the end of a civil war in which a country meets Ulfelder and Lustik’s (2007) criteria for democracy and “0” otherwise.
- (2) *Multiple forms of power sharing*: Employing coding rules from Hartzell and Hoddie (2007), we examine all civil wars to determine whether or not each of the four forms of power sharing is present in the settlement. If rivals agree to at least two of the four dimensions of power sharing –i.e., political, military, territorial, and economic – as part of the terms of a war-ending settlement, we code the power sharing variable “1.” If rivals adopt fewer than two dimensions of power sharing, this variable is scored “0.”
- (3) *Peacekeeping operation*: Coded “1” for those conflicts to which peacekeeping forces were sent at the war’s end and “0” otherwise. We use Fortna (2004), Doyle and Sambanis (2006), and the Armed Conflict Database to create this measure.
- (4) *Mediation*: Scored “1” if there was mediation of the conflict and “0” otherwise. We use data from Regan, Frank, and Aydin (2009) and DeRouen, Bercovitch, and Pospieszna (2011) in coding this variable

(5) *Civil war duration*: Recorded as the number of months the conflict endures. We employ Hartzell and Hoddie's data for this measure. We use IISS's Armed Conflict Database to update the data through 2006. The variable is logged.

(6) *Previous civil war*: Coded "1" if adversaries have previously fought one another in the context of a civil war and "0" otherwise. We use the Armed Conflict Database as well as the codebooks for Sambanis (2006) and the Correlates of War's IntraState Wars datasets (Sarkees and Wayman 2010) to generate this variable.

(7) *Previous democratic experience*: Coded "1" if a country meets Ulfelder and Lustik's criteria for democracy in any of the five years prior to the outbreak of the civil war and "0" otherwise.

(8) *GDP per capita*: Recorded as the annual real GDP per capita. The data are from the Penn World Tables (Heston, Summers, and Aten 2009). The variable is lagged and logged.

(9) *Post-cold war*: Coded "1" if a civil war was ended from 1990 onward and "0" otherwise.

### **Selection Equation**

(1) *Multiple forms of power sharing*: Operationalization described for the outcome equation.

(2) *Mediation*: Operationalization described for the outcome equation.

(3) *Previous civil war*: Operationalization described for the outcome equation.

(4) *GDP per capita*: Operationalization described for the outcome equation.

(5) *Relative rebel strength*: Scored "1" if any rebel group's forces is at parity with or stronger than the government's military and "0" otherwise. We use Cunningham et al.'s

(2009) data to code this variable, altering it from their dyadic form to conflict-level data.

(6) *Post-cold war*: Operationalization described for the outcome equation.

(7) *Linguistic fractionalization*: Measures the probability that two randomly selected people will not belong to the same language group for the year 2001. The higher the value, the greater the level of fractionalization. Original measures developed by Alesina et al. 2003. Description and data drawn from Teorell et al. (2013).

(8) *Exports as a percentage of GDP*: Measures exports of goods and services as a percentage of GDP for a given year. The indicator is logged. Drawn from data available from the World Bank and OECD. Description and data drawn from Teorell et al. (2013).

(9) *Negotiated settlement*: Coded “1” if a country ended its war via a negotiated settlement and “0” otherwise. We use Hartzell’s “Settling Civil Wars” dataset (2009) for this measure.

(10) *Military victory*: Coded “1” if a country ended its war via a military victory and “0” otherwise. We rely on Hartzell’s “Settling Civil Wars” dataset for this measure.

### **Variables for Robustness Tests Described in Endnote 70**

(1) *Foreign aid*: “Official development aid and official aid flows, net of repayment.” In constant 2008 US dollars, logged. Data from the OECD. Description of the variable and data drawn from Teorell et al. (2013).

(2) *Mountainous terrain*: Logged measure of the percentage of the country’s territory that is mountainous. Drawn from Fearon and Laitin (2003).

(3) *Stakes*: Coded as “1” for those conflicts in which the primary issue at stake in the war was ethnic, racial, or linguistic; scored “0” otherwise. To code this variable, we rely on

Licklider (1995), Hartzell and Hoddie (2007), SIPRI Yearbook summaries of civil war cases, and case study materials.

## References

Doyle, Michael W. and Nicholas Sambanis. 2006. *Making War and Building Peace: United Nations Peace Operations*. Princeton, NJ: Princeton University Press.

Fortna, Virginia Page. 2004. "Does Peacekeeping Keep Peace? International Intervention and the Duration of Peace after Civil War." *International Studies Quarterly* 48, no. 2: 269-92.

Hartzell, Caroline. 2009. "Settling Civil Wars: Armed Opponents' Fates and the Duration of the Peace." *Conflict Management and Peace Science* 26, no. 4: 347-365.

Regan, Patrick M., Richard W. Frank, and Aysegul Aydin. 2009. "Diplomatic Interventions and Civil War: A New Dataset." *Journal of Peace Research* 46, no.1: 135-146.

Sarkees, Meredith Reid, and Frank Whelon Wayman. 2010. *Resort to War: A Data Guide to Inter-State, Extra-State, Intra-State, and Non-State Wars, 1816-2007*. Washington, D.C.: Congressional Quarterly Inc.

Small, Melvin , and J. David Singer. 1982. *Resort to Arms: International and Civil Wars, 1816-1980*. Beverly Hills, CA: Sage.

Teorell, Jan, Nicholas Charron, Stefan Dahlberg, Sören Holmberg, Bo Rothstein, Petrus Sundin and Richard Svensson. 2013. "The Quality of Government Dataset, Version 20 December 2013." University of Gothenburg: The Quality of Government Institute. At <http://www.qog.pol.gu.se>, accessed November 12, 2014.
